# Supplementary material
Source: PubMed Central journal article supplement (PMC3952015)
Supplement: NIHMS437013-supplement-2.pdf [file NIHMS437013-supplement-2.pdf]

**Supplemental Figure 2. Transfection with pre-miR-181a does not affect viability of naive CD4<sup>+</sup> T cells after 48h in culture.**

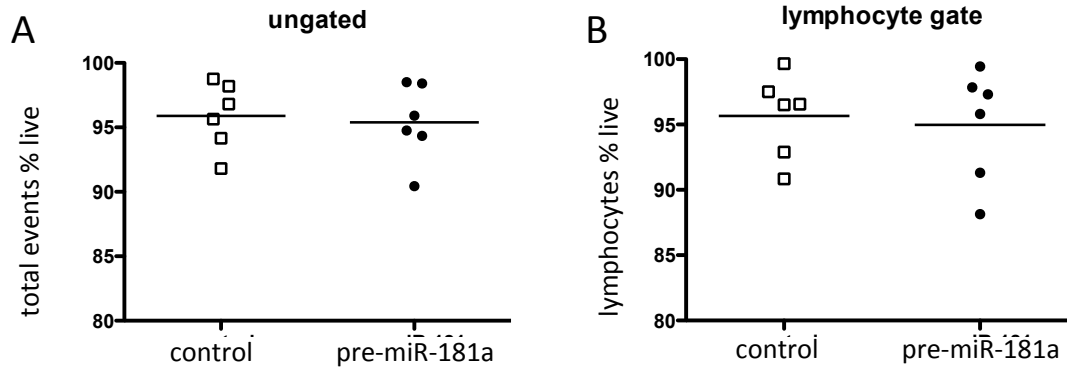

APB naive CD4<sup>+</sup> T cells were transfected with pre-miR-181a or a control, non-targeting pre-miRNA. Viability was assessed by staining for 7AAD after 48h in culture at 37°C. **(A)** Percent live cells (7AAD<sup>-</sup>) was not significantly different in total events. **(B)** Percent live cells (7AAD<sup>-</sup>) was not significantly different within the lymphocyte population.
